# Psychiatric Services

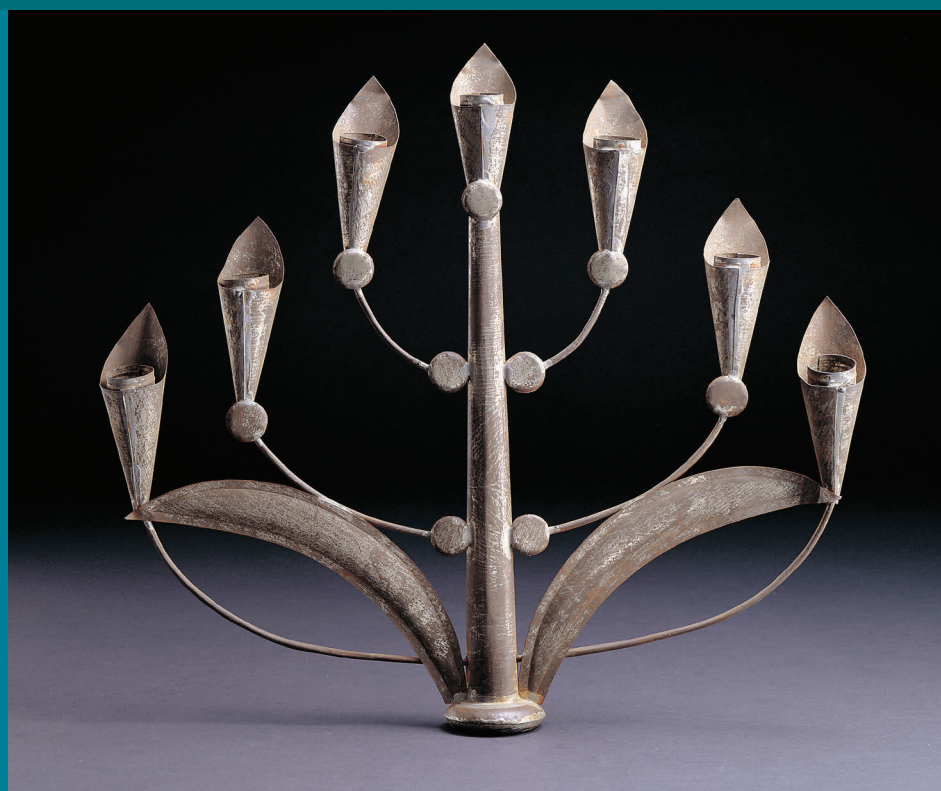

Does hiring independent contractors affect EBP uptake in public clinics?

Barriers to engaging military service members in mental health care

Recommendations for improving SSA's financial capability assessments

AOT and long-term antipsychotic use: ongoing controversy and debate
